# Supplementary material
Source: PubMed Central journal article supplement (PMC3356917)
Supplement: NIHMS363755-supplement-2.pdf [file NIHMS363755-supplement-2.pdf]

**Supplementary Table 1. Participant characteristics**

| <b>Characteristic</b>                              | <b>Preeclampsia<br/>(n=10)</b> | <b>No Preeclampsia<br/>(n=13)</b> | <b>P</b> |
|----------------------------------------------------|--------------------------------|-----------------------------------|----------|
| Age (yrs)                                          | 32.4 (28.5 – 34.9)             | 32.0 (28.6 – 35.7)                | 0.88     |
| Gravidity                                          | 2.0 (1.0 – 4.0)                | 1.0 (1.0 – 4.0)                   | 0.65     |
| Parity                                             | 0.0 (0.0 – 2.0)                | 0.0 (0.0 – 0.0)                   | 0.33     |
| Pre-pregnancy body mass index (kg/m <sup>2</sup> ) | 27.6 (24.2 – 34.7)             | 21.4 (20.4 – 22.5)                | 0.01     |
| Race/ethnicity                                     |                                |                                   | 0.42     |
| White/Caucasian                                    | 8 (80.0)                       | 7 (53.9)                          |          |
| Black/African American                             | 0 (0.0)                        | 3 (23.1)                          |          |
| Asian                                              | 1 (10.0)                       | 2 (15.4)                          |          |
| Other/Unknown                                      | 1 (10.0)                       | 1 (7.7)                           |          |
| History of pregnancy-induced hypertension          | 3 (30.0)                       | 0 (0.0)                           | 0.07     |
| Smoking                                            |                                |                                   | 0.07     |
| Never                                              | 7 (70.0)                       | 13 (100.0)                        |          |
| Past/quit before pregnancy                         | 1 (10.0)                       | 0 (0.0)                           |          |
| Quit early pregnancy                               | 2 (20.0)                       | 0 (0.0)                           |          |
| Gestational age (wks)                              | 36.6 (33.0 – 37.4)             | 37.6 (34.7 – 38.7)                | 0.32     |
| Blood pressure on day of echocardiogram            |                                |                                   |          |
| Systolic blood pressure (mm Hg)                    | 135.0 (126.0 – 148.0)          | 108.0 (104.0 – 116.0)             | <0.001   |
| Diastolic blood pressure (mm Hg)                   | 84.5 (78.0 – 93.0)             | 65.0 (62.0 – 70.0)                | 0.003    |
| 24-hour urine (mg/24 hrs)                          | 589.5 (426.5– 1372.0)          | *N/A                              | --       |
| Mode of delivery                                   |                                |                                   | 0.09     |
| Vaginal delivery                                   | 2 (20.0)                       | 8 (61.5)                          |          |
| Cesarean delivery                                  | 8 (80.0)                       | 5 (38.5)                          |          |
| Birth weight (gm)                                  | 2845 (1835– 3270)              | 3145 (2805 – 3590)                | 0.19     |
| Gestational age at delivery (wks)                  | 36.9 (33.1 – 37.4)             | 39.3 (38.1 – 40.3)                | 0.009    |

Data are presented as n (%) or median (interquartile range). \*24-hour urine only available for patients with preeclampsia

**Supplementary Table 2. Echocardiographic parameters and angiogenic factor levels**

| <b>Characteristic</b> | <b>Preeclampsia<br/>(n=10)</b> | <b>No Preeclampsia<br/>(n=17)</b> | <b>*p-value</b> |
|-----------------------|--------------------------------|-----------------------------------|-----------------|
| MPI                   | 0.55 (0.39–0.71)               | 0.33 (0.28–0.38)                  | 0.001           |
| E/E'                  | 8.1 (6.4–8.4)                  | 5.8 (5.3–6.9)                     | 0.09            |
| Ejection fraction     | 66.5 (65.0–70.0)               | 65.0 (65.0–72.0)                  | 1.0             |
| sFlt1 (pg/mL)**       | 14748.5 (13132.0–39826)        | 6281.0 (3554.0–9096.0)            | 0.007           |
| PlGF (pg/mL)**        | 123.5 (95.0–184.0)             | 330.0 (239.0–500.0)               | 0.004           |
| sFlt1/PlGF ratio**    | 111.41 (75.2–299.4)            | 12.3 (7.7–48.1)                   | 0.003           |

Data are presented as median (interquartile range). \*p<0.05 is significant. \*\*n=13 in the group without preeclampsia.

**Supplementary Table 3. Relationship between PPCM and PE reported in the literature.**

| Author                      | Year | Site       | Retro Vs Prosp | Multi Vs Single Site | Ethnicity                    | N          | Incidence Hypertensive Disorders                                    | Incidence Twin pregs | Echo Def. of PPCM |
|-----------------------------|------|------------|----------------|----------------------|------------------------------|------------|---------------------------------------------------------------------|----------------------|-------------------|
| Saltzberg <sup>1</sup>      | 2012 | USA        | R              | registry             | 43% AA                       | 107        | 39% PE/GHTN                                                         | 15%                  | Dx codes          |
| Safirstein <sup>2</sup>     | 2012 | USA        | R              | Web registry         | 90% Wh                       | 55         | 42% GHTN/PE                                                         | 15%                  | EF<45             |
| Kamiya <sup>3</sup>         | 2011 | Japan      | R              | M                    | Asian                        | 102        | 41% HTN (NOD)                                                       | 8%                   | EF<50             |
| Goland <sup>4,#,&amp;</sup> | 2011 | USA        | R              | M                    | 25% AA                       | 187        | 41% GHTN no mention PE                                              | 18%                  | EF<45             |
| Goland <sup>5,&amp;</sup>   | 2009 | S Calif    | R              | M                    | 56% Wh<br>29% Bl             | 182        | 43% GHTN (NOD)                                                      | 15%                  | EF<45             |
| Modi <sup>6</sup>           | 2009 | Louisiana  | R              | S                    | 89% AA<br>11% Wh             | 44         | 45% HTN (NOD)                                                       | 17%                  | EF<45             |
| Sliwa <sup>7,**</sup>       | 2009 | S Africa   | P              | S                    | African                      | 80         | na                                                                  | na                   | EF<45             |
| Duran <sup>8</sup>          | 2007 | Turkey     | R+P            | S                    | na                           | 33         | 4% GHTN<br>6% HTN<br>no mention PE                                  | na                   | EF<45             |
| Brar <sup>9</sup>           | 2007 | S Calif    | R              | M                    | 28% AA<br>27% Wh<br>20% Hisp | 60         | na                                                                  | na                   | EF<50             |
| Amos <sup>10</sup>          | 2006 | N Carolina | R              | S                    | 51% AA<br>39% Wh             | 55         | 46% E+PE<br>56% HTN                                                 | na                   | EF<45             |
| Sliwa <sup>11,**</sup>      | 2006 | S Africa   | P              | S                    | African                      | 100        | HTN <i>excluded</i>                                                 | na                   | EF<40             |
| Mielniczuk <sup>12</sup>    | 2006 | USA        | R              | d/c records          | 42% Wh<br>32% AA             | 16,2<br>96 | 22.5% HTN:<br>9.5% PE<br>3% PE+HTN<br>1% E<br>.6% HTN<br>7% HTN NOS | na                   | Dx codes          |
| Fett <sup>13</sup>          | 2005 | Haiti      | P              | S                    | African                      | 98         | 4% PE<br>15% HTN NOD                                                | na                   | EF<45             |
| Elkayam <sup>14,*</sup>     | 2005 | USA        | R              | M                    | 67% Wh<br>19% AA             | 123        | 43% HTN:<br>15% PE<br>15% PE+HTN<br>7% GHTN<br>3% E<br>3% HTN       | 13%                  | EF<45             |
| Chapa <sup>15</sup>         | 2005 | Illinois   | R              | S                    | 22% Wh<br>78% AA             | 32         | 16% PE (severe PE excluded)                                         | 13%                  | EF<30             |
| Felker <sup>16</sup>        | 2000 | Maryland   | R              | S                    | 52% Wh<br>46% AA             | 42         | 43% HTN:<br>26% GHTN<br>17% HTN                                     | 12%                  | Not stated        |
| Witlin <sup>17</sup>        | 1996 | Tennessee  | P              | S                    | 75% AA                       | 28         | 68% HTN:<br>25% PE<br>43% HTN                                       | na                   | "dilated"         |
| Demakis <sup>18</sup>       | 1971 | Illinois   | P              | S                    | 93% AA                       | 27         | 22% PE                                                              | 7%                   | "CHF"             |

PPCM: Peripartum Cardiomyopathy

PE: Preeclampsia

E: Eclampsia

HTN: Hypertension

GHTN: Gestational Hypertension

NOD: Not otherwise defined

AA: African american

Wh: White

Hisp: Hispanic

Na: not available

d/c: discharge

dx: diagnosis

\*, \*\* Different patient populations

# Combination of populations from Modi et al (2009), Elkayam et al (2005), Goland (2009), and Safirstein et al (2012)

& Likely the same patient population

## REFERENCES

1. Saltzberg, M.T., Szymkiewicz, S. & Bianco, N.R. Characteristics and outcomes of peripartum versus nonperipartum cardiomyopathy in women using a wearable cardiac defibrillator. *J Card Fail* **18**, 21-27 (2012).
2. Safirstein, J.G., *et al.* Predictors of left ventricular recovery in a cohort of peripartum cardiomyopathy patients recruited via the internet. *Int J Cardiol* (2012).
3. Kamiya, C.A., *et al.* Different characteristics of peripartum cardiomyopathy between patients complicated with and without hypertensive disorders. -Results from the Japanese Nationwide survey of peripartum cardiomyopathy. *Circ J* **75**, 1975-1981 (2011).
4. Goland, S., *et al.* Evaluation of the clinical relevance of baseline left ventricular ejection fraction as a predictor of recovery or persistence of severe dysfunction in women in the United States with peripartum cardiomyopathy. *J Card Fail* **17**, 426-430 (2011).
5. Goland, S., *et al.* Clinical profile and predictors of complications in peripartum cardiomyopathy. *J Card Fail* **15**, 645-650 (2009).
6. Modi, K.A., Illum, S., Jariatul, K., Caldito, G. & Reddy, P.C. Poor outcome of indigent patients with peripartum cardiomyopathy in the United States. *Am J Obstet Gynecol* **201**, 171 e171-175 (2009).
7. Sliwa, K., *et al.* Long-term outcome of peripartum cardiomyopathy in a population with high seropositivity for human immunodeficiency virus. *Int J Cardiol* **147**, 202-208 (2011).
8. Duran, N., Gunes, H., Duran, I., Biteker, M. & Ozkan, M. Predictors of prognosis in patients with peripartum cardiomyopathy. *Int J Gynaecol Obstet* **101**, 137-140 (2008).
9. Brar, S.S., *et al.* Incidence, mortality, and racial differences in peripartum cardiomyopathy. *Am J Cardiol* **100**, 302-304 (2007).
10. Amos, A.M., Jaber, W.A. & Russell, S.D. Improved outcomes in peripartum cardiomyopathy with contemporary. *Am Heart J* **152**, 509-513 (2006).
11. Sliwa, K., *et al.* Peripartum cardiomyopathy: inflammatory markers as predictors of outcome in 100 prospectively studied patients. *Eur Heart J* **27**, 441-446 (2006).
12. Mielniczuk, L.M., *et al.* Frequency of peripartum cardiomyopathy. *Am J Cardiol* **97**, 1765-1768 (2006).

13. Fett, J.D., Christie, L.G., Carraway, R.D. & Murphy, J.G. Five-year prospective study of the incidence and prognosis of peripartum cardiomyopathy at a single institution. *Mayo Clin Proc* **80**, 1602-1606 (2005).
14. Elkayam, U., *et al.* Pregnancy-associated cardiomyopathy: clinical characteristics and a comparison between early and late presentation. *Circulation* **111**, 2050-2055 (2005).
15. Chapa, J.B., *et al.* Prognostic value of echocardiography in peripartum cardiomyopathy. *Obstet Gynecol* **105**, 1303-1308 (2005).
16. Felker, G.M., *et al.* Myocarditis and long-term survival in peripartum cardiomyopathy. *Am Heart J* **140**, 785-791 (2000).
17. Witlin, A.G., Mabie, W.C. & Sibai, B.M. Peripartum cardiomyopathy: an ominous diagnosis. *Am J Obstet Gynecol* **176**, 182-188 (1997).
18. Demakis, J.G., *et al.* Natural course of peripartum cardiomyopathy. *Circulation* **44**, 1053-1061 (1971).
